# Supplementary material for: Revealing insights into the axial coordination effect of M–N4 catalysts on electrocatalytic activity towards the oxygen reduction reaction
Source: Royal Society of Chemistry journal article supplement (doi:10.1039/d3ta03701k), 2023-01-01
Supplement: d3ta03701k1.pdf [file d3ta03701k1.pdf]

## Revealing Insights into the Axial Coordination Effect of M-N<sub>4</sub> Catalysts on Electrocatalytic Activity towards Oxygen Reduction Reaction

Youxuan Ni<sup>1</sup>, Weiwei Xie<sup>1\*</sup>, Jun Chen<sup>1\*</sup>

<sup>1</sup> *Key Laboratory of Advanced Energy Materials Chemistry (Ministry of Education),  
Haihe Laboratory of Sustainable Chemical Transformations, College of Chemistry,  
Nankai University, Tianjin 300071, China*

Email: [xieweiwei@nankai.edu.cn](mailto:xieweiwei@nankai.edu.cn); [chenabc@nankai.edu.cn](mailto:chenabc@nankai.edu.cn)

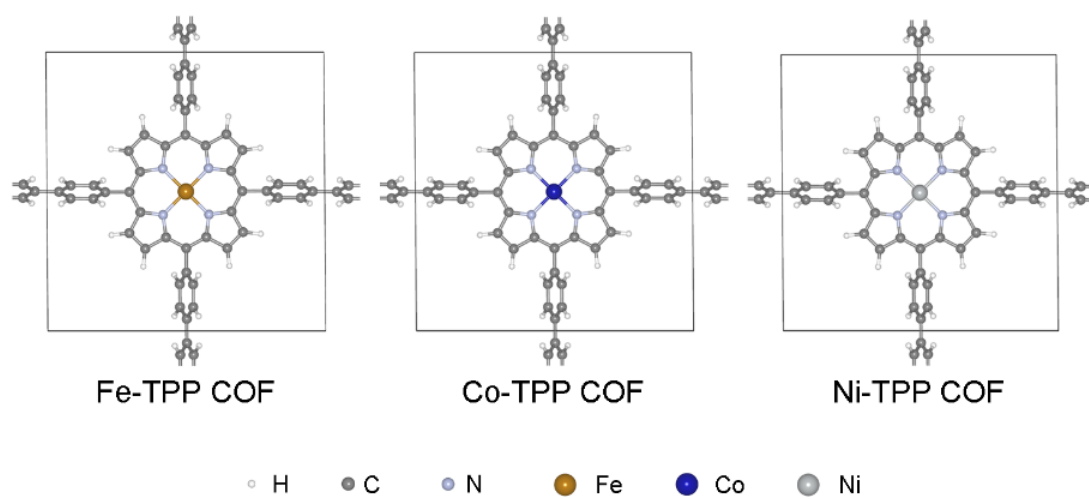

Figure S1. The atomic structure of the whole unit cell for the Fe/Co/Ni-TPP COFs.

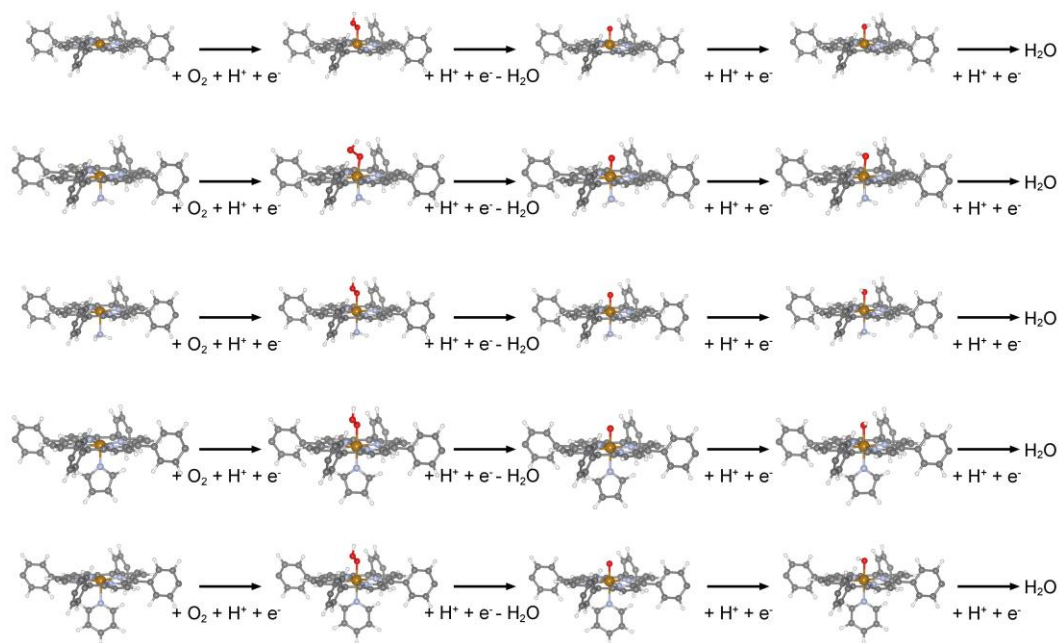

Figure S2. ORR routes on Fe-TPP-L COFs (L = none/NH<sub>2</sub>/NH<sub>3</sub>/prN/pdN).

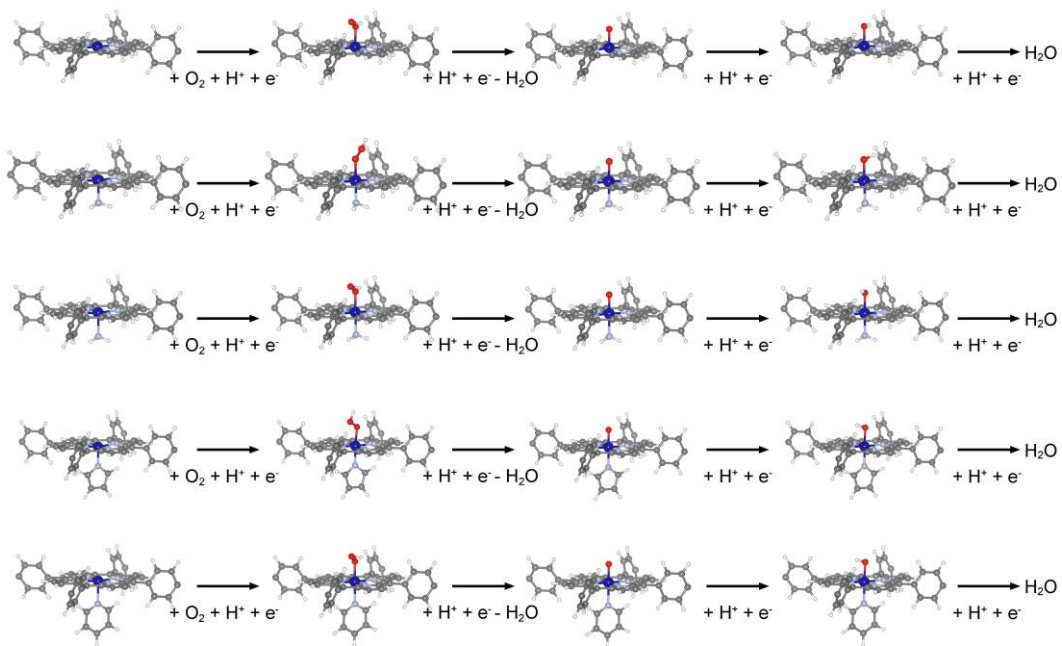

Figure S3. ORR routes on Co-TPP-L COFs (L = none/NH<sub>2</sub>/NH<sub>3</sub>/prN/pdN).

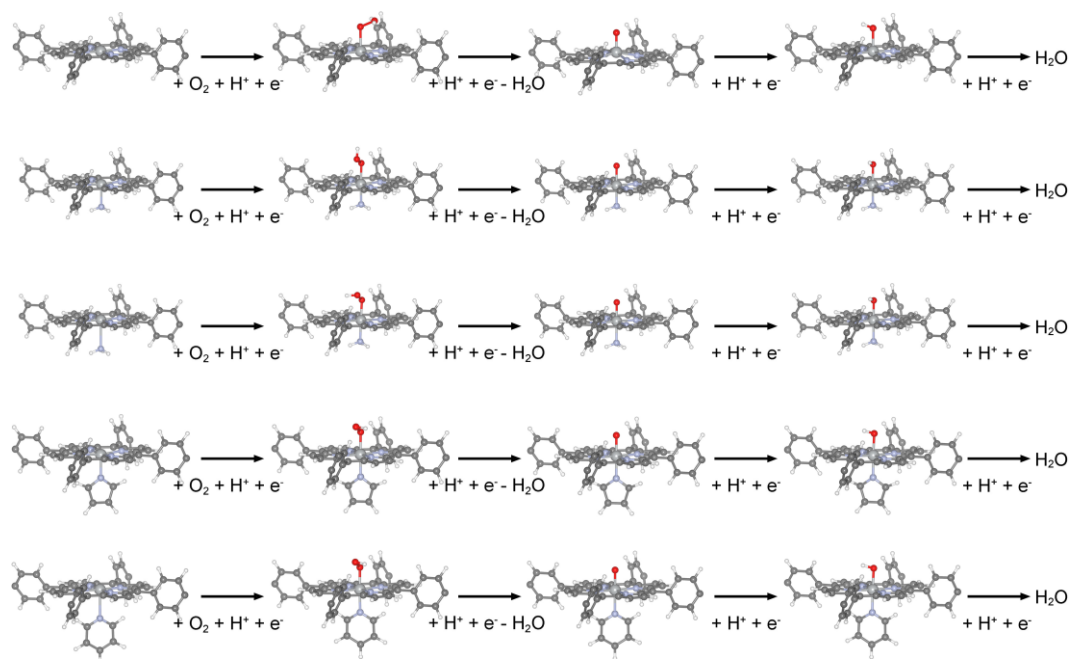

Figure S4. ORR routes on Ni-TPP-L COFs (L = none/NH<sub>2</sub>/NH<sub>3</sub>/prN/pdN).

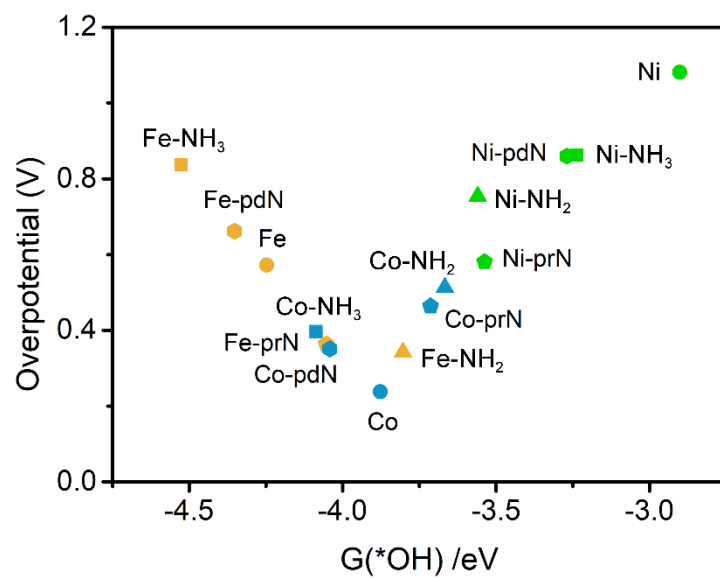

Figure S5. ORR activity volcano of M-TPP-L COF catalysts (M = Fe/Co/Ni, L = none/NH<sub>2</sub>/NH<sub>3</sub>/prN/pdN).

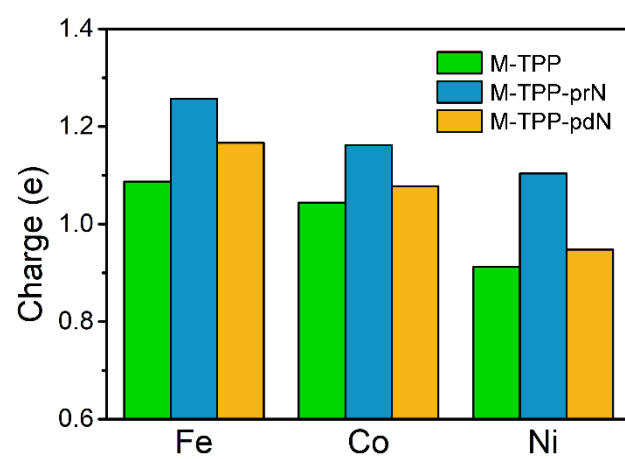

Figure S6. Bader charge of Fe, Co and Ni centers on M-TPP-none/prN/pdN COFs.

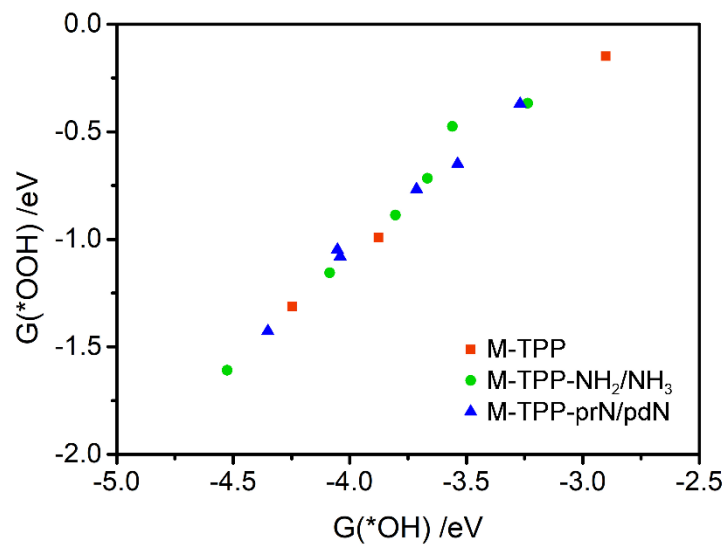

Figure S7. Linear relationship between Gibbs adsorption free energies of \*OOH and \*OH for M-TPP-L COF catalysts (M = Fe/Co/Ni, L = none/NH<sub>2</sub>/NH<sub>3</sub>/prN/pdN).



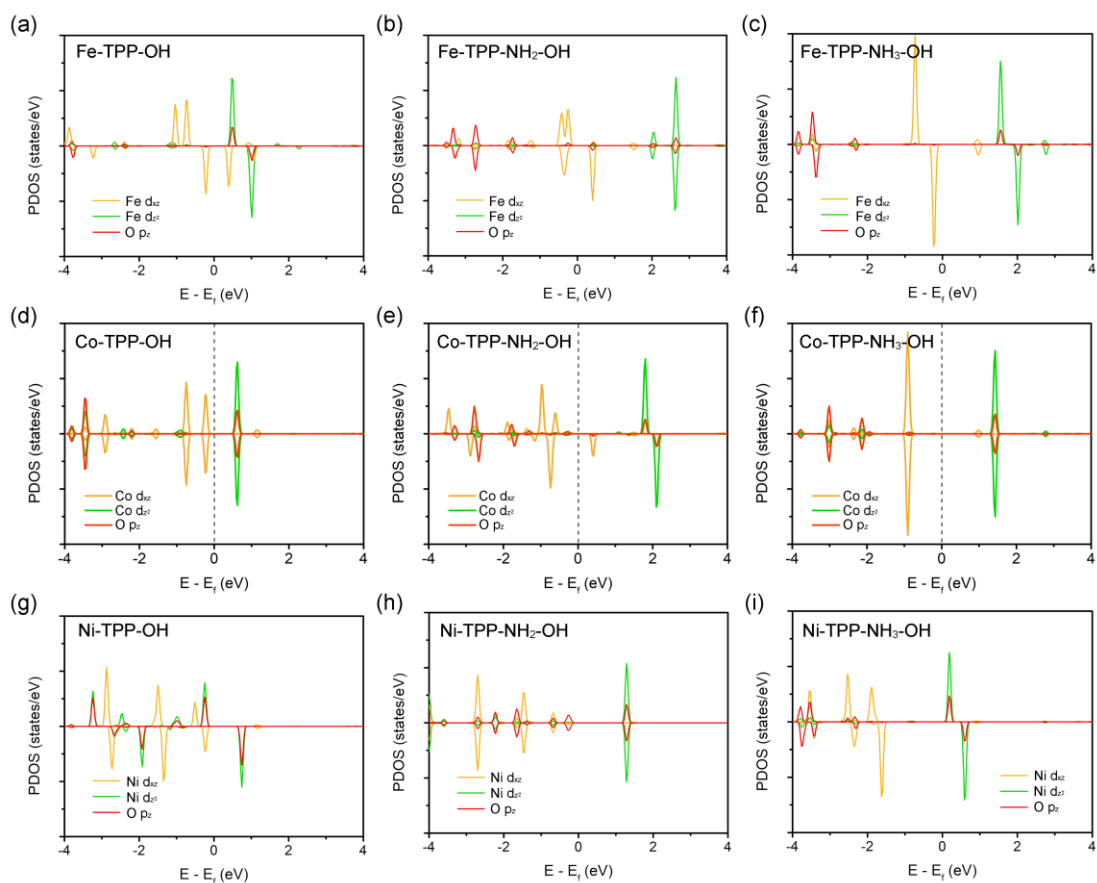

Figure S8. PDOS of (a) Fe-TPP, (b) Fe-TPP-NH<sub>2</sub>, (c) Fe-TPP-NH<sub>3</sub>, (d) Co-TPP, (e) Co-TPP-NH<sub>2</sub>, (f) Co-TPP-NH<sub>3</sub>, (g) Ni-TPP, (h) Ni-TPP-NH<sub>2</sub> and (i) Ni-TPP-NH<sub>3</sub> COFs with adsorbed OH species.

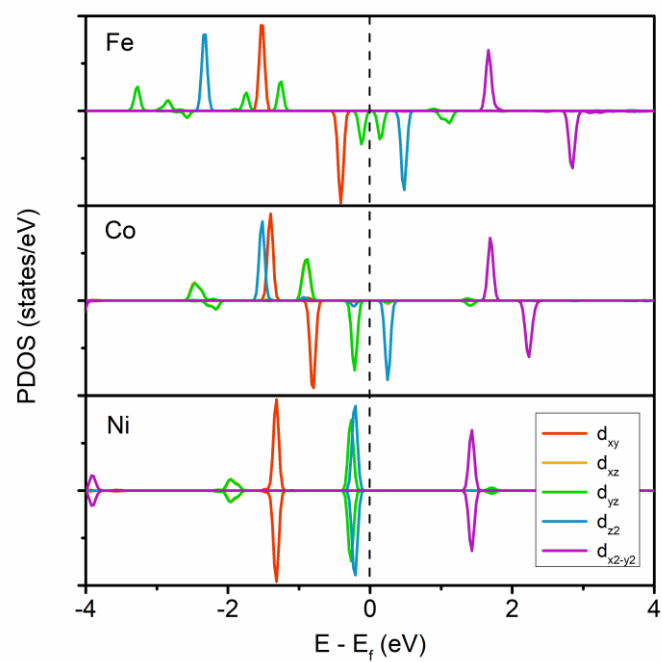

Figure S9. PDOS of d orbitals of Fe, Co and Ni centers in M-TPP COFs without axial ligands.

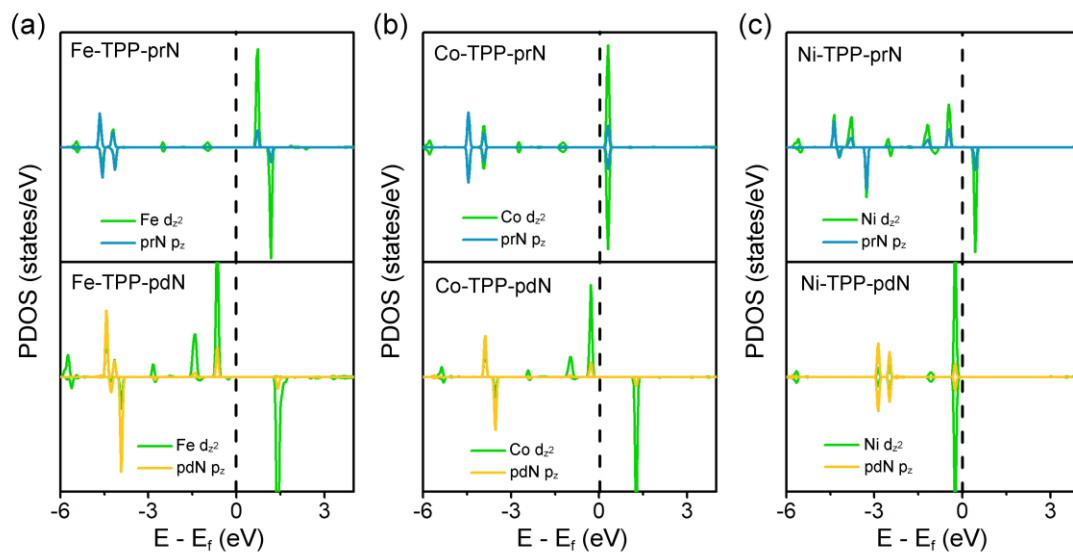

Figure S10. PDOS of (a) Fe-TPP-prN/pdN COFs, (b) Co-TPP-prN/pdN COFs, (c) Ni-TPP-prN/pdN COFs.

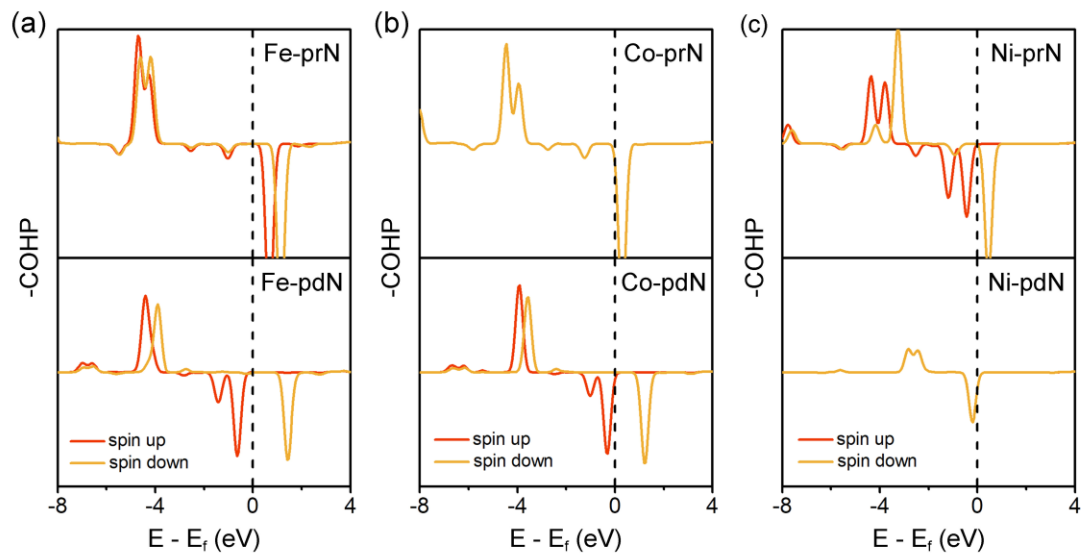

Figure S11. COHP of (a) Fe-TPP-prN/pdN COFs, (b) Co-TPP-prN/pdN COFs and (c) Ni-TPP-prN/pdN COFs.

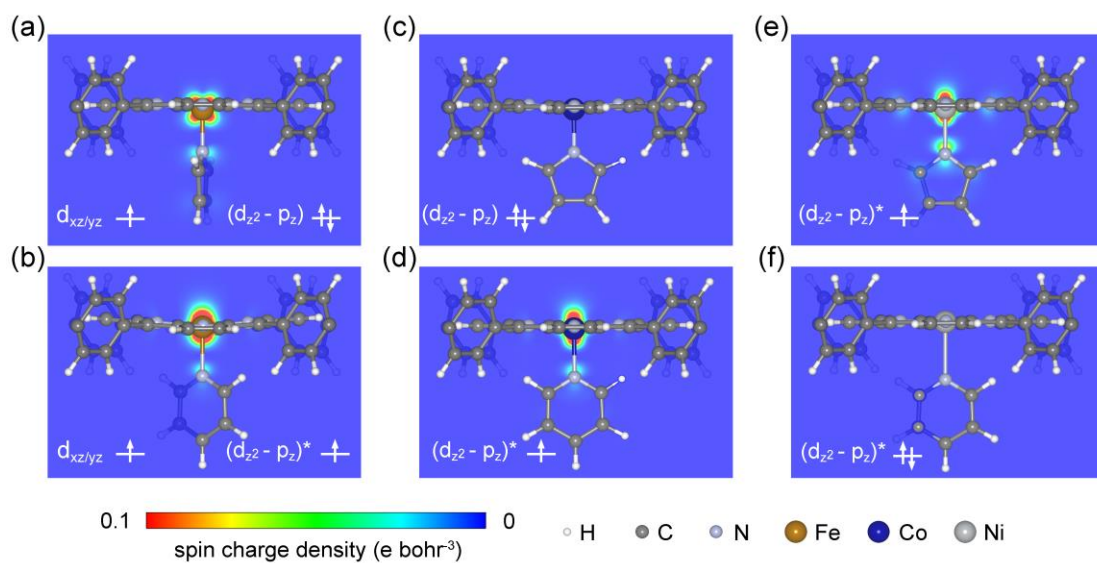

Figure S12. Spin charge density of (a) Fe-TPP-prN COFs, (b) Fe-TPP-pdN COFs, (c) Co-TPP-prN COFs (d) Co-TPP-pdN COFs, (e) Ni-TPP-prN COFs and (f) Ni-TPP-pdN COFs. Spin electrons of catalysts are marked in white.

| species                    | $\mu$ ( $\mu_B$ ) | species                    | $\mu$ ( $\mu_B$ ) | species                    | $\mu$ ( $\mu_B$ ) |
|----------------------------|-------------------|----------------------------|-------------------|----------------------------|-------------------|
| Fe-TPP                     | 2.00              | Co-TPP                     | 1.00              | Ni-TPP                     | 0.00              |
| Fe-TPP-OH                  | 1.00              | Co-TPP-OH                  | 0.00              | Ni-TPP-OH                  | 1.00              |
| Fe-TPP-NH <sub>2</sub>     | 1.00              | Co-TPP-NH <sub>2</sub>     | 0.00              | Ni-TPP-NH <sub>2</sub>     | 1.00              |
| Fe-TPP-NH <sub>2</sub> -OH | 0.00              | Co-TPP-NH <sub>2</sub> -OH | 1.00              | Ni-TPP-NH <sub>2</sub> -OH | 0.00              |
| Fe-TPP-NH <sub>3</sub>     | 0.00              | Co-TPP-NH <sub>3</sub>     | 1.00              | Ni-TPP-NH <sub>3</sub>     | 0.00              |
| Fe-TPP-NH <sub>3</sub> -OH | 1.00              | Co-TPP-NH <sub>3</sub> -OH | 0.00              | Ni-TPP-NH <sub>3</sub> -OH | 1.00              |
| Fe-TPP-prN                 | 1.00              | Co-TPP-prN                 | 0.00              | Ni-TPP-prN                 | 1.00              |
| Fe-TPP-prN-OH              | 2.00              | Co-TPP-prN-OH              | 0.99              | Ni-TPP-prN-OH              | 0.00              |
| Fe-TPP-pdN                 | 0.00              | Co-TPP-pdN                 | 1.00              | Ni-TPP-pdN                 | 0.00              |
| Fe-TPP-pdN-OH              | 1.00              | Co-TPP-pdN-OH              | 0.00              | Ni-TPP-pdN-OH              | 1.00              |

Table S1. The calculated magnetic moments of Fe/Co/Ni-TPP-none/NH<sub>2</sub>/NH<sub>3</sub>/prN/pdN COFs and the corresponding systems with adsorbed OH species.

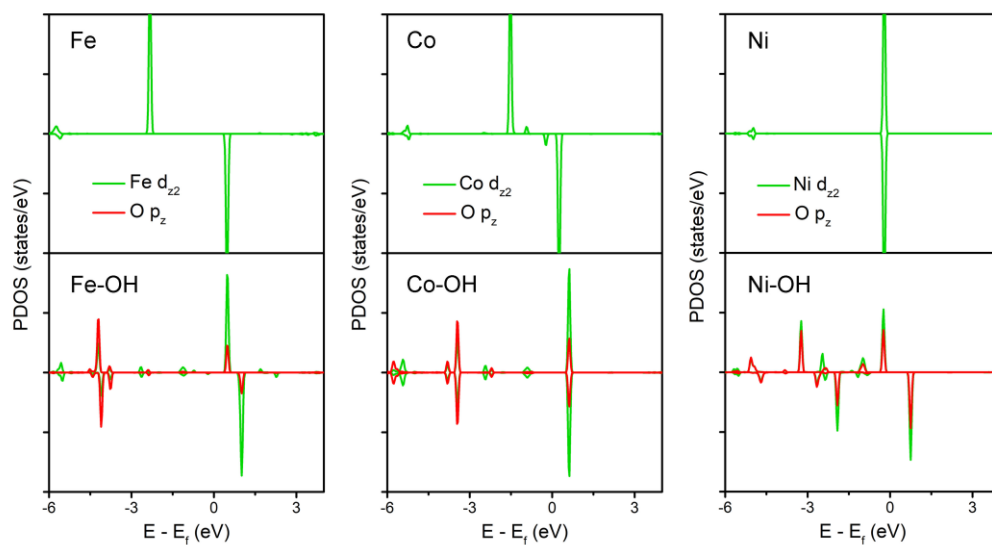

Figure S13. PDOS of Fe/Co/Ni-TPP COFs with and without adsorbed OH.

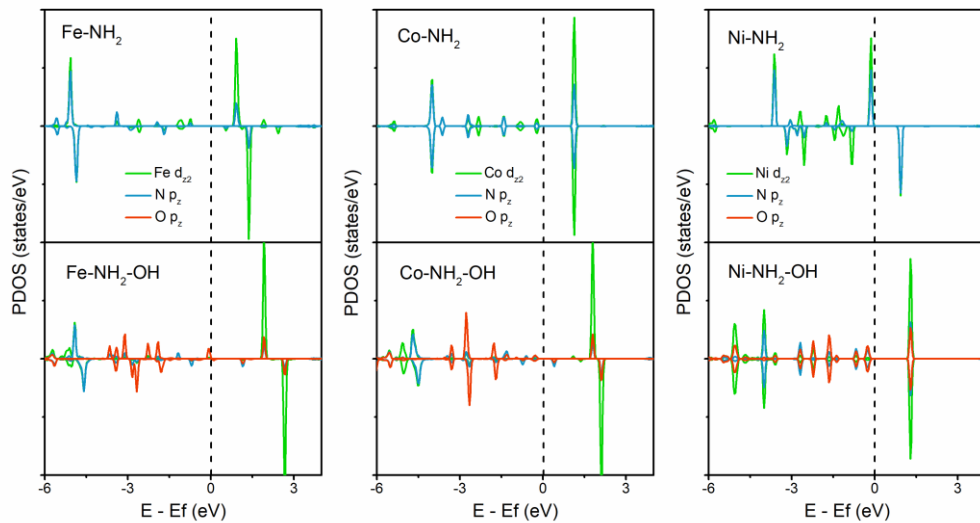

Figure S14. PDOS of Fe/Co/Ni-TPP-NH<sub>2</sub> COFs with and without adsorbed OH.



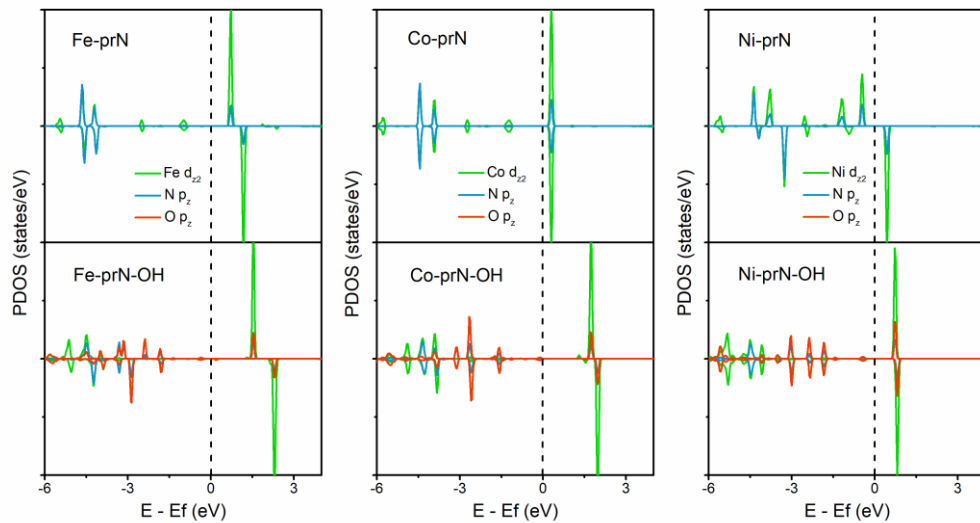

Figure S15. PDOS of Fe/Co/Ni-TPP-prN COFs with and without adsorbed OH.

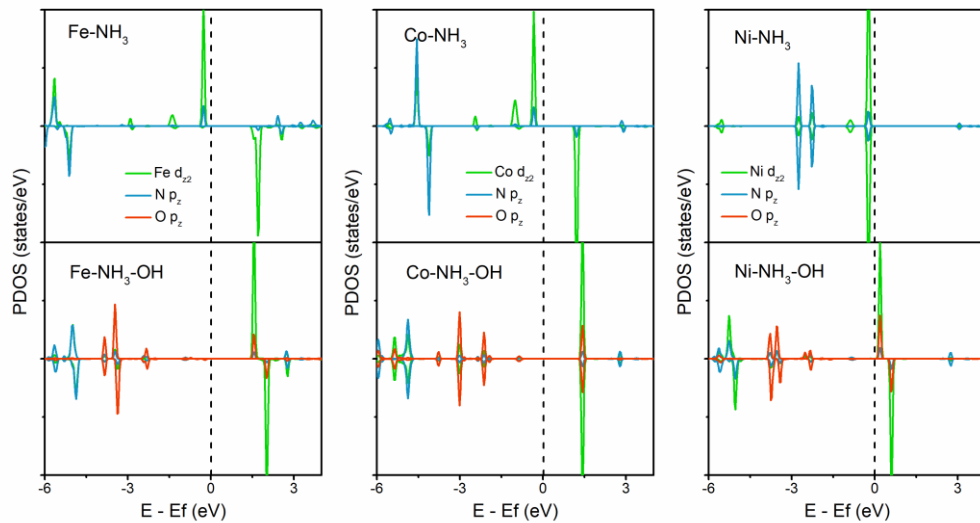

Figure S16. PDOS of Fe/Co/Ni-TPP-NH<sub>3</sub> COFs with and without adsorbed OH.

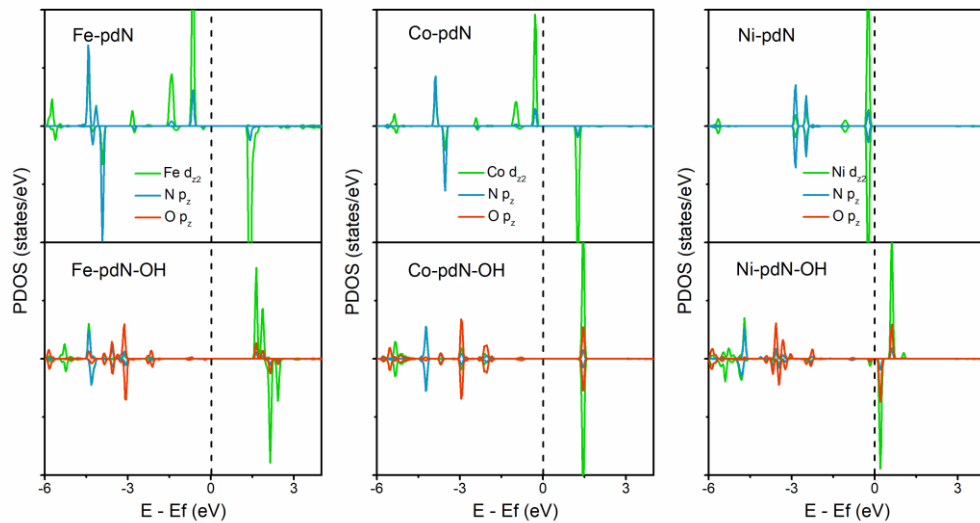

Figure S17. PDOS of Fe/Co/Ni-TPP-pdN COFs with and without adsorbed OH.

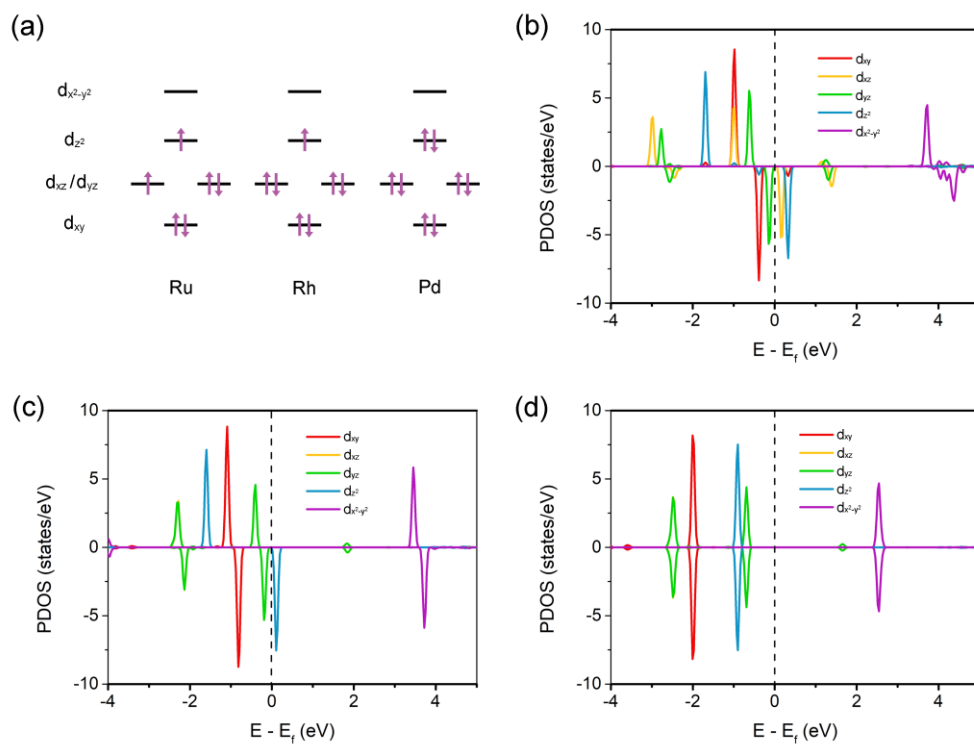

Figure S18. (a) The d orbitals of metal centers in Ru/Rh/Pd-TPP COFs. The corresponding PDOS of (b) Ru-TPP COFs, (c) Rh-TPP COFs and (d) Pd-TPP COFs.

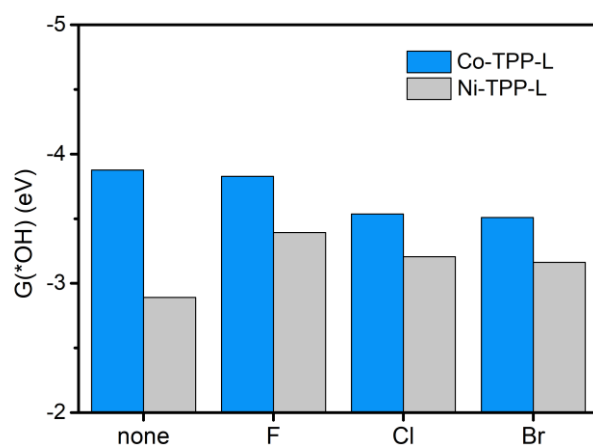

Figure S19. Free energies of \*OH intermediates on Co/Ni-TPP-L (L = none/F/Cl/Br).
